# Supplementary material for: Identification of Novel Circular RNAs of the Human Protein Arginine Methyltransferase 1 (PRMT1) Gene, Expressed in Breast Cancer Cells
Source: MDPI journal article supplement (doi:10.3390/genes13071133), 2022-06-24
Supplement: s1 [file s1]

**Table S2.** Primers used in first- and second-round PCR assays for the selective amplification of *PRMT1* circular variants and the main variant of *GAPDH*.

| Direction | Name        | Sequence (5' → 3')    | Length (nt <sup>1</sup> ) | T <sub>m</sub> (°C) | T <sub>a</sub> (°C) |
|-----------|-------------|-----------------------|---------------------------|---------------------|---------------------|
| F         | PRMT1_5F    | CGGCACCTCTTCAAGGACAA  | 20                        | 61                  | 59                  |
| R         | PRMT1_5R    | ATGAAACATGGAGTTGCGGT  | 20                        | 58                  |                     |
| F         | PRMT1_5Fin  | GGCATCCTCTGCATGTTTGC  | 20                        | 61                  | 60                  |
| R         | PRMT1_5Rin  | CCTCGTCCTTCAGCATCTC   | 19                        | 59                  |                     |
| F         | PRMT1_7F    | GAGTCCATGCTCAACACCGT  | 20                        | 61                  | 61                  |
| R         | PRMT1_7R    | GAAGAGGCAGTAGCCCATCC  | 20                        | 61                  |                     |
| F         | PRMT1_7Fin  | CTATGCCCCGGGACAAGTGG  | 19                        | 62                  | 61                  |
| R         | PRMT1_7Rin  | TCGCTGATGATGATGTCCACC | 21                        | 60                  |                     |
| F         | GAPDH Ex2 F | CCACATCGCTCAGACACCAT  | 20                        | 60                  | 60                  |
| R         | GAPDH Ex4 R | TGACAAGCTTCCCGTTCTCA  | 20                        | 58                  |                     |

<sup>1</sup>nucleotides
