# Supplementary material for: Identification of Novel Circular RNAs of the Human Protein Arginine Methyltransferase 1 (PRMT1) Gene, Expressed in Breast Cancer Cells
Source: MDPI journal article supplement (doi:10.3390/genes13071133), 2022-06-24
Supplement: s1 [file s1]

**Table S1.** Characteristics of the four breast cancer cell lines that were used in the study.

| Cell line  | Disease histology | Morphology | Molecular subtype                                | Tumor source                 | ER status <sup>1</sup> | PR status <sup>2</sup> | HER2 + status <sup>3</sup> | Some Mutated Genes                   |
|------------|-------------------|------------|--------------------------------------------------|------------------------------|------------------------|------------------------|----------------------------|--------------------------------------|
| BT-20      | Carcinoma         | Epithelial | Triple-negative, Luminal Androgen Receptor (LAR) | Primary                      | -                      | -                      | -                          | <i>CDKN2A, PIK3CA, TP53</i>          |
| MCF-7      | Adenocarcinoma    | Epithelial | Luminal A                                        | Metastasis, pleural effusion | +                      | +                      | -                          | <i>CDKN2A, GATA3, PIK3CA, TP53</i>   |
| MDA-MB-231 | Adenocarcinoma    | Epithelial | Triple-negative, Mesenchymal Stem-Like (MSL)     | Metastasis, pleural effusion | -                      | -                      | -                          | <i>BRAF, CDKN2A, KRAS, NF2, TP53</i> |
| MDA-MB-468 | Adenocarcinoma    | Epithelial | Triple-negative, Basal-Like 1 (BL1)              | Metastasis, pleural effusion | -                      | -                      | -                          | <i>PTEN, RB1, SMAD4, TP53</i>        |

<sup>1</sup>estrogen receptor, <sup>2</sup>progesterone receptor, <sup>3</sup>human epidermal growth factor receptor 2
