# Supplementary material for: Identification of Novel Circular RNAs of the Human Protein Arginine Methyltransferase 1 (PRMT1) Gene, Expressed in Breast Cancer Cells
Source: MDPI journal article supplement (doi:10.3390/genes13071133), 2022-06-24
Supplement: s1 [file s1]

**Table S5.** The results from the Kyoto Encyclopedia of Genes and Genomes (KEGG) pathway analysis regarding the miRNA-targeted mRNAs, whose expression is predicted to be affected by the 9 *PRMT1* circRNAs.

| <i>PRMT1</i> circRNA | Target miRNA | miRNA-targeted mRNA | KEGG pathway                                                                                      |
|----------------------|--------------|---------------------|---------------------------------------------------------------------------------------------------|
| circ-PRMT1-1         | miR-494-3p   | <i>STT3B</i>        | Metabolic pathways                                                                                |
|                      | miR-6754-3p  | <i>ATP5F1E</i>      |                                                                                                   |
| circ-PRMT1-2         | miR-494-3p   | <i>STT3B</i>        |                                                                                                   |
|                      | miR-6754-3p  | <i>ATP5F1E</i>      |                                                                                                   |
| circ-PRMT1-3         | miR-494-3p   | <i>STT3B</i>        |                                                                                                   |
|                      | miR-6754-3p  | <i>ATP5F1E</i>      |                                                                                                   |
| circ-PRMT1-4         | miR-494-3p   | <i>STT3B</i>        |                                                                                                   |
|                      | miR-6754-3p  | <i>ATP5F1E</i>      |                                                                                                   |
| circ-PRMT1-5         | miR-494-3p   | <i>STT3B</i>        |                                                                                                   |
|                      | miR-6754-3p  | <i>ATP5F1E</i>      |                                                                                                   |
| circ-PRMT1-6         | miR-494-3p   | <i>STT3B</i>        |                                                                                                   |
|                      | miR-6754-3p  | <i>ATP5F1E</i>      |                                                                                                   |
| circ-PRMT1-7         | miR-494-3p   | <i>STT3B</i>        | Metabolic pathways                                                                                |
|                      | miR-1306-3p  | <i>PDHA1</i>        | Glucagon signaling pathway                                                                        |
|                      |              | <i>PPP3CC</i>       | Calcium signaling pathway                                                                         |
|                      |              |                     |                                                                                                   |
| circ-PRMT1-8         | miR-1538-3p  | <i>CERS1</i>        | Metabolic pathways                                                                                |
|                      |              | <i>GNAS</i>         | Calcium signaling pathway; cAMP signaling pathway; glucagon signaling pathway; pathways in cancer |
|                      |              | <i>RAI1</i>         | Calcium signaling pathway; cAMP signaling pathway                                                 |
|                      | miR-4745-3p  | <i>GNAS</i>         | Calcium signaling pathway; cAMP signaling pathway; glucagon signaling pathway; pathways in cancer |
| circ-PRMT1-9         | miR-588-5p   | <i>COL4A4</i>       | Pathways in cancer                                                                                |
|                      |              | <i>MGAT1</i>        | Metabolic pathways                                                                                |
|                      |              | <i>SPTLC2</i>       |                                                                                                   |
|                      | miR-4696-5p  | <i>MAX</i>          | Pathways in cancer                                                                                |
|                      |              | <i>RARB</i>         |                                                                                                   |
|                      |              | <i>VAV3</i>         | cAMP signaling pathway                                                                            |
