# Supplementary material for: Identification of Novel Circular RNAs of the Human Protein Arginine Methyltransferase 1 (PRMT1) Gene, Expressed in Breast Cancer Cells
Source: MDPI journal article supplement (doi:10.3390/genes13071133), 2022-06-24
Supplement: s1 [file s1]

**Table S3.** The full list of miRNAs that are predicted to bind to the novel *PRMT1* circRNAs, according to the miRDB database.

| <i>PRMT1</i> circRNA | Target miRNA     | Prediction score <sup>1</sup> |
|----------------------|------------------|-------------------------------|
| circ-PRMT1-1         | hsa-miR-6754-3p  | 80                            |
|                      | hsa-miR-494-3p   | 76                            |
|                      | hsa-miR-1306-5p  | 71                            |
|                      | hsa-miR-412-3p   | 65                            |
|                      | hsa-miR-4433b-3p | 64                            |
|                      | hsa-miR-4756-3p  | 60                            |
|                      | hsa-miR-3973-3p  | 52                            |
|                      | hsa-miR-6852-3p  | 51                            |
|                      | hsa-miR-648-5p   | 50                            |
| circ-PRMT1-2         | hsa-miR-6754-3p  | 77                            |
|                      | hsa-miR-494-3p   | 76                            |
|                      | hsa-miR-1306-5p  | 71                            |
|                      | hsa-miR-412-3p   | 67                            |
|                      | hsa-miR-4433b-3p | 63                            |
|                      | hsa-miR-4756-3p  | 60                            |
|                      | hsa-miR-3973-3p  | 52                            |
|                      | hsa-miR-3682-3p  | 51                            |
|                      | hsa-miR-6852-3p  | 51                            |
| circ-PRMT1-3         | hsa-miR-494-3p   | 76                            |
|                      | hsa-miR-6754-3p  | 68                            |
|                      | hsa-miR-4433b-3p | 63                            |
|                      | hsa-miR-6883-5p  | 60                            |
|                      | hsa-miR-6785-5p  | 60                            |
|                      | hsa-miR-4728-5p  | 60                            |
|                      | hsa-miR-149-3p   | 60                            |
|                      | hsa-miR-4756-3p  | 59                            |
|                      | hsa-miR-412-3p   | 57                            |
|                      | hsa-miR-3973-3p  | 52                            |
|                      | hsa-miR-6852-3p  | 51                            |
| circ-PRMT1-4         | hsa-miR-494-3p   | 76                            |
|                      | hsa-miR-6754-3p  | 68                            |
|                      | hsa-miR-4433b-3p | 63                            |
|                      | hsa-miR-4756-3p  | 60                            |
|                      | hsa-miR-412-3p   | 57                            |
|                      | hsa-miR-3973-3p  | 52                            |
|                      | hsa-miR-6852-3p  | 51                            |
| circ-PRMT1-5         | hsa-miR-494-3p   | 75                            |
|                      | hsa-miR-6754-3p  | 67                            |
|                      | hsa-miR-4433b-3p | 62                            |
|                      | hsa-miR-4745-3p  | 61                            |
|                      | hsa-miR-4756-3p  | 59                            |
|                      | hsa-miR-1538-3p  | 57                            |
|                      | hsa-miR-412-3p   | 56                            |
|                      | hsa-miR-3973-3p  | 51                            |
|                      | hsa-miR-6852-3p  | 50                            |
| circ-PRMT1-6         | hsa-miR-494-3p   | 78                            |

|              |                  |    |
|--------------|------------------|----|
|              | hsa-miR-6754-3p  | 73 |
|              | hsa-miR-4756-3p  | 65 |
|              | hsa-miR-412-3p   | 62 |
|              | hsa-miR-2467-3p  | 50 |
| circ-PRMT1-7 | hsa-miR-494-3p   | 76 |
|              | hsa-miR-1306-5p  | 66 |
|              | hsa-miR-4756-3p  | 64 |
|              | hsa-miR-4433b-3p | 63 |
|              | hsa-miR-3973-3p  | 52 |
|              | hsa-miR-6852-3p  | 51 |
| circ-PRMT1-8 | hsa-miR-4745-3p  | 65 |
|              | hsa-miR-1538-3p  | 62 |
|              | hsa-miR-3682-3p  | 57 |
|              | hsa-miR-4646-5p  | 53 |
|              | hsa-miR-204-3p   | 53 |
|              | hsa-miR-4314-5p  | 52 |
| circ-PRMT1-9 | hsa-miR-4696-5p  | 86 |
|              | hsa-miR-588-5p   | 71 |
|              | hsa-miR-4701-5p  | 71 |
|              | hsa-miR-1827-3p  | 65 |
|              | hsa-miR-4745-3p  | 63 |
|              | hsa-miR-4713-5p  | 62 |
|              | hsa-miR-1538-3p  | 59 |
|              | hsa-miR-4283-5p  | 51 |
|              | hsa-miR-6813-5p  | 50 |
|              | hsa-miR-6085-3p  | 50 |
|              | hsa-miR-4646-5p  | 50 |
|              | hsa-miR-204-3p   | 50 |

<sup>1</sup>The prediction score is on a scale up to 100.
